# Supplementary material
Source: publisher figshare collection journal article supplement (https://frontiersin.figshare.com/ndownloader/files/17448986)
Supplement: Supplementary file 1 [file 17448986]

|                      | pre-emergence mortality<br>( <i>O. coloradensis</i> & <i>O. tersula</i> ) |             |                  |              | winter emergence<br>( <i>O. lignaria</i> ) |             |                  |                  |
|----------------------|---------------------------------------------------------------------------|-------------|------------------|--------------|--------------------------------------------|-------------|------------------|------------------|
|                      | <i>Res. df</i>                                                            | <i>Dev.</i> | <i>Res. Dev.</i> | <i>P</i>     | <i>Res. df</i>                             | <i>Dev.</i> | <i>Res. Dev.</i> | <i>P</i>         |
| sex                  | 1,245                                                                     | 0.43        | 340.82           | 0.524        | 1,243                                      | 27.32       | 262.08           | <b>&lt;0.001</b> |
| temperature          | 1,244                                                                     | 0.03        | 340.79           | 0.875        | 1,242                                      | 0.46        | 261.62           | 0.496            |
| fall duration        | 1,243                                                                     | 2.86        | 337.93           | 0.099        | 1,241                                      | 2.24        | 259.38           | 0.135            |
| spring onset         | 1,242                                                                     | 11.96       | 325.97           | <b>0.001</b> | 1,240                                      | 126.9       | 132.49           | <b>&lt;0.001</b> |
| body size            | 1,241                                                                     | 4.57        | 321.39           | <b>0.037</b> | 1,239                                      | 0.82        | 131.67           | 0.364            |
| sex x temp           | 1,240                                                                     | 0.74        | 320.65           | 0.403        | 1,238                                      | 7.01        | 124.66           | <b>0.008</b>     |
| sex x fall           | 1,239                                                                     | 1.51        | 319.15           | 0.231        | 1,237                                      | 5.40        | 119.26           | <b>0.020</b>     |
| sex x spring         | 1,238                                                                     | 0.09        | 319.06           | 0.771        | 1,236                                      | 2.56        | 116.70           | 0.110            |
| temp x fall          | 1,237                                                                     | 0.06        | 319.00           | 0.812        | 1,235                                      | 8.10        | 108.60           | <b>0.004</b>     |
| temp x spring        | 1,236                                                                     | 1.73        | 317.27           | 0.200        | 1,234                                      | 0.52        | 108.08           | 0.473            |
| temp x body size     | 1,235                                                                     | 0.56        | 316.71           | 0.467        | 1,233                                      | 0.02        | 108.06           | 0.876            |
| fall x spring        | 1,234                                                                     | 0.27        | 316.44           | 0.611        | 1,232                                      | 0.00        | 108.06           | 0.967            |
| fall x body size     | 1,233                                                                     | 1.30        | 315.14           | 0.266        | 1,231                                      | 0.07        | 107.99           | 0.793            |
| spring x body size   | 1,232                                                                     | 0.02        | 315.12           | 0.901        | 1,230                                      | 0.12        | 107.87           | 0.731            |
| temp x fall x spring | 1,231                                                                     | 0.24        | 314.88           | 0.630        | 1,229                                      | 1.45        | 106.42           | 0.228            |

Table S3. Full ANOVA tables (i.e., results for all independent variables and interactions) of the generalized linear models fitted separately to pre-emergence mortality and to the probability of winter emergence (i.e., emerging prior to the start of the spring treatment). See Materials and Methods *Statistical Analyses: Mixed-effects and Generalized Linear Models* for description of independent variables.
